# Supplementary material for: Light-blue thermally activated delayed fluorescent emitters realizing a high external quantum efficiency of 25% and unprecedented low drive voltages in OLEDs
Source: Royal Society of Chemistry journal article supplement (doi:10.1039/c5tc04057d), 2016-01-01
Supplement: c5tc04057d1.pdf [file c5tc04057d1.pdf]

## Supporting information

### **Light-Blue Thermally Activated Delayed Fluorescent Emitters Realizing a High External Quantum Efficiency of 25% and Unprecedented Low Drive Voltages in OLEDs**

*Ryutaro Komatsu,<sup>a</sup> Hisahiro Sasabe,<sup>\*a,b</sup> Yuki Seino,<sup>a</sup> Kohei Nakao,<sup>a</sup> and Junji Kido<sup>\*a,b</sup>*

*a. Department of Organic Device Engineering, Graduate School of Science and Engineering, Yamagata University, Yonezawa, Yamagata, 992-8510 Japan.*

*b. Research Center for Organic Electronics (ROEL), Yamagata University, Yonezawa, Yamagata, 992-8510 Japan.*

*E-mail: h-sasabe@yz.yamagata-u.ac.jp; kid@yz.yamagata-u.ac.jp*

## General procedure

*General Considerations:* Quantum chemical calculations were performed using the hybrid DFT functional Becke and Hartree-Fock exchange and Lee Yang and Parr correlation (B3LYP) as implemented by the Gaussian 09 program packages. Electrons were described by the Pople's 6-31G(d) and 6-311+G(d,p) basis sets for molecular structure optimization and single-point energy calculations, respectively.  $^1\text{H}$  NMR and  $^{13}\text{C}$  NMR spectra were recorded on JEOL 400 (400 MHz) spectrometer. Mass spectrum was obtained using a JEOL JMS-K9 mass spectrometer. DSC was performed using a Perkin-Elmer Diamond DSC Pyris instrument under nitrogen atmosphere at a heating rate of  $10\text{ }^{\circ}\text{C min}^{-1}$ . TGA was undertaken using a SEIKO EXSTAR 6000 TG/DTA 6200 unit under nitrogen atmosphere at a heating rate of  $10\text{ }^{\circ}\text{C min}^{-1}$ . UV-vis spectra was measured using a Shimadzu UV-3150 UV-vis-NIR spectrophotometer. Photoluminescence spectra were measured using a FluoroMax-2 (Jobin-Yvon-Spex) luminescence spectrometer. The  $I_p$  was determined by a PYS under the vacuum ( $=10^{-3}$  Pa). Transient PL decay curves and time resolved photoluminescence spectra were measured by using a streak camera (C4334 from Hamamatsu Photonics) at 5 K and 300 K.

*Device Fabrication and Characterization:* The substrates were cleaned with ultrapurified water and organic solvents, and then dry-cleaned for 30 minutes by exposure to UV-ozone. The organic layers were deposited onto the ITO substrates under the vacuum ( $=10^{-5}$  Pa), successively. LiF and Al was patterned using a shadow mask with an array of  $2\text{ mm} \times 2\text{ mm}$  openings without breaking the vacuum ( $=10^{-5}$  Pa). The electroluminescent (EL) were taken using an optical multichannel analyzer Hamamatsu Photonics PMA-11. The current density-voltage and luminance-voltage characteristics were measured by using a Keithley source measure unit 2400 and a Minolta CS200 luminance meter, respectively.

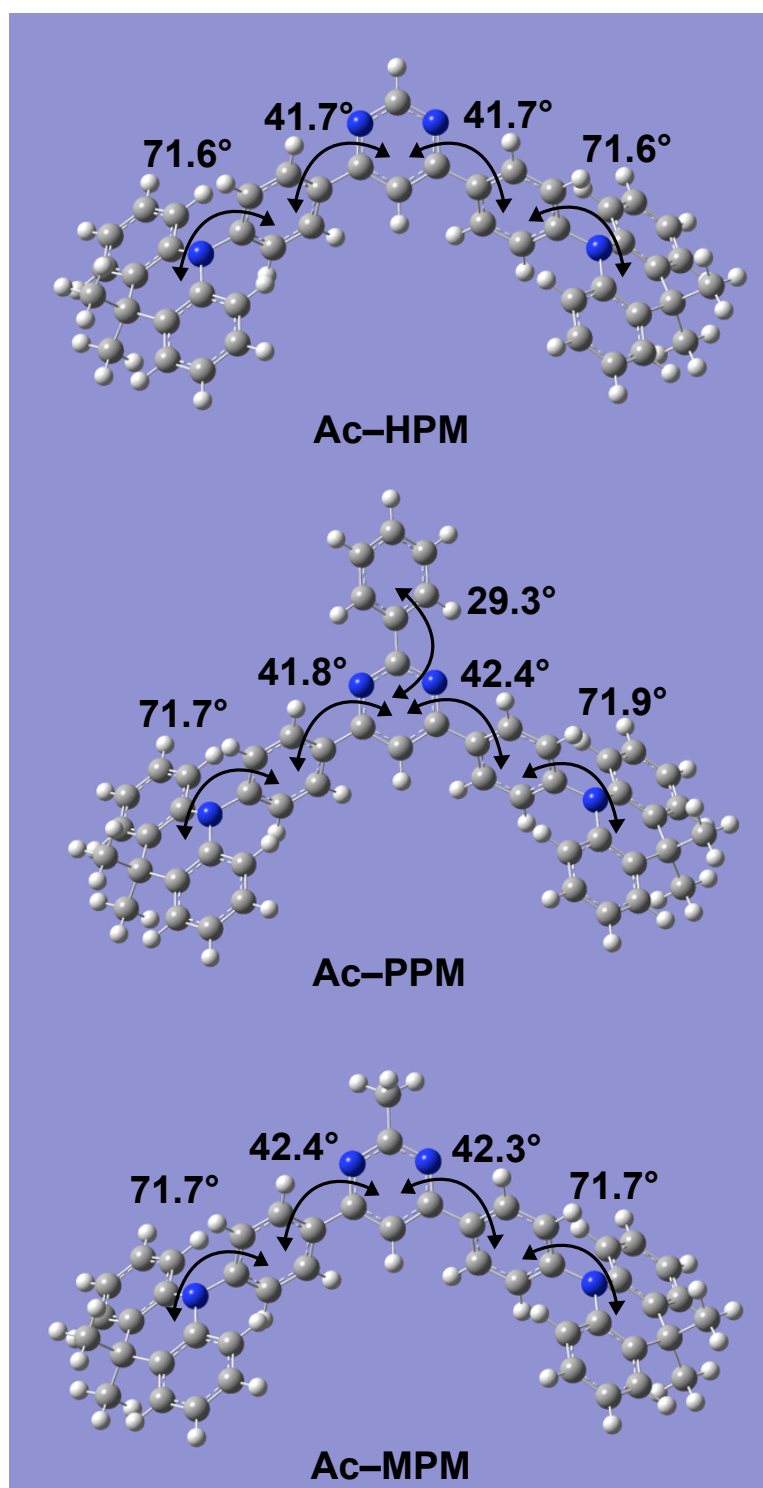

**Figure S-1.** Optimized molecular structures and dihedral angles of **Ac-RPM** derivatives.

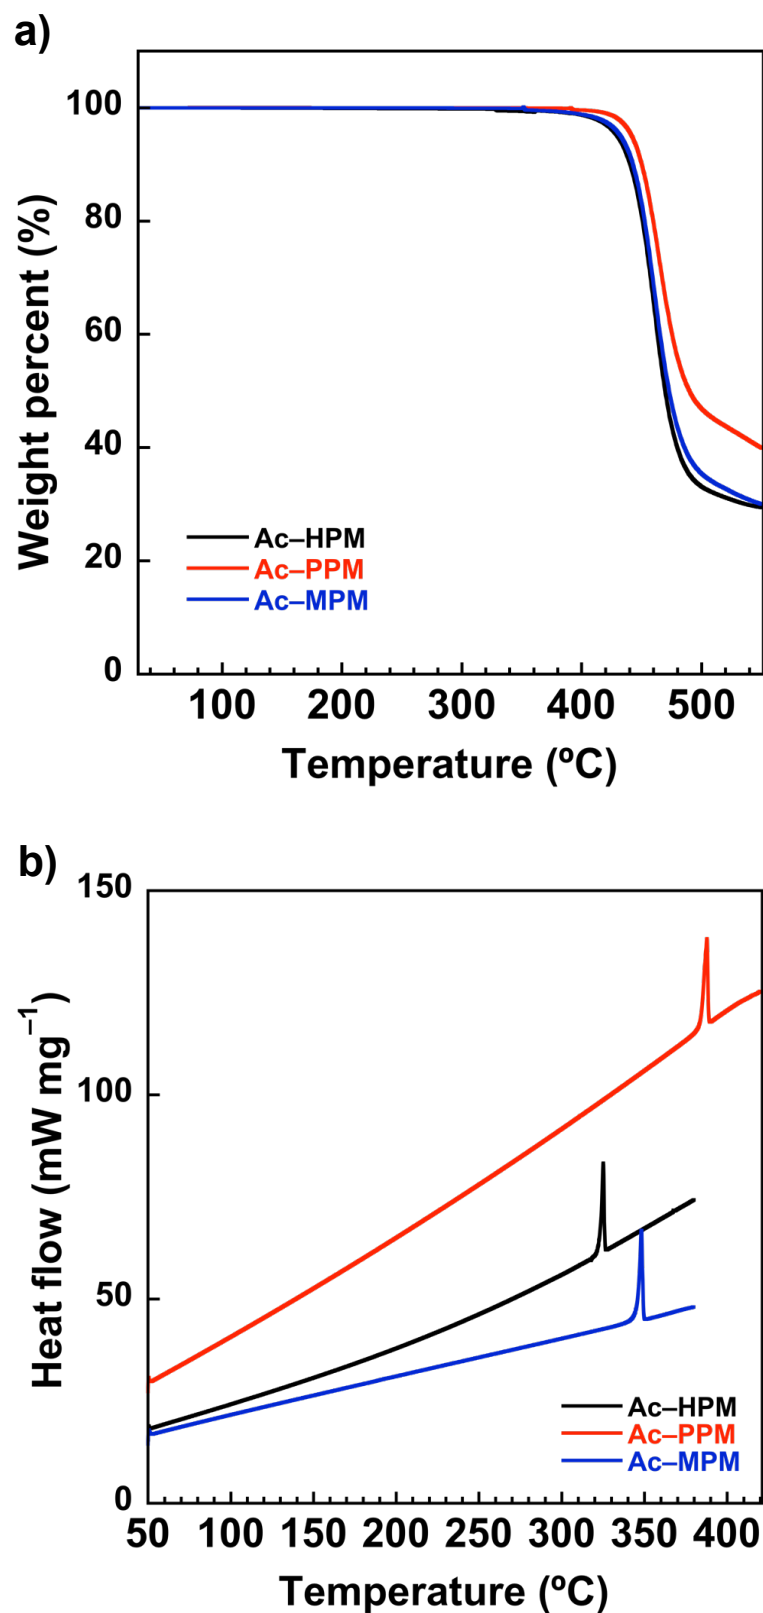

**Figure S-2.** a) TGA thermograms and b) DSC curves of Ac-RPM derivatives.

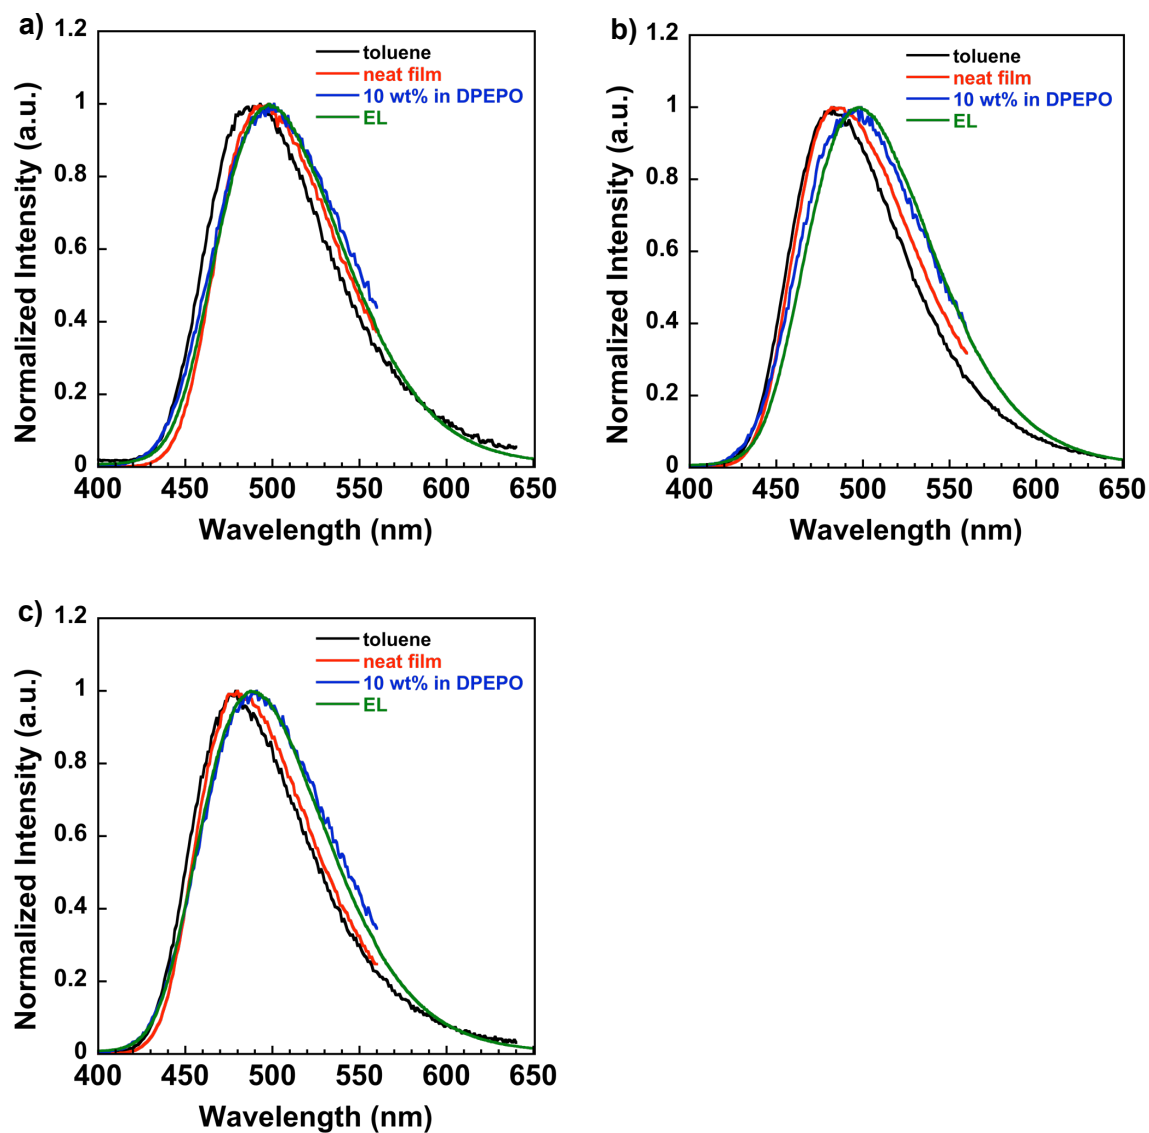

**Figure S-3.** PL spectra of toluene solution, neat film (30 nm), 10 wt% doped in DPEPO film (30 nm), and EL spectra of a) **Ac-HPM**, b) **Ac-PPM**, and c) **Ac-MPM**.

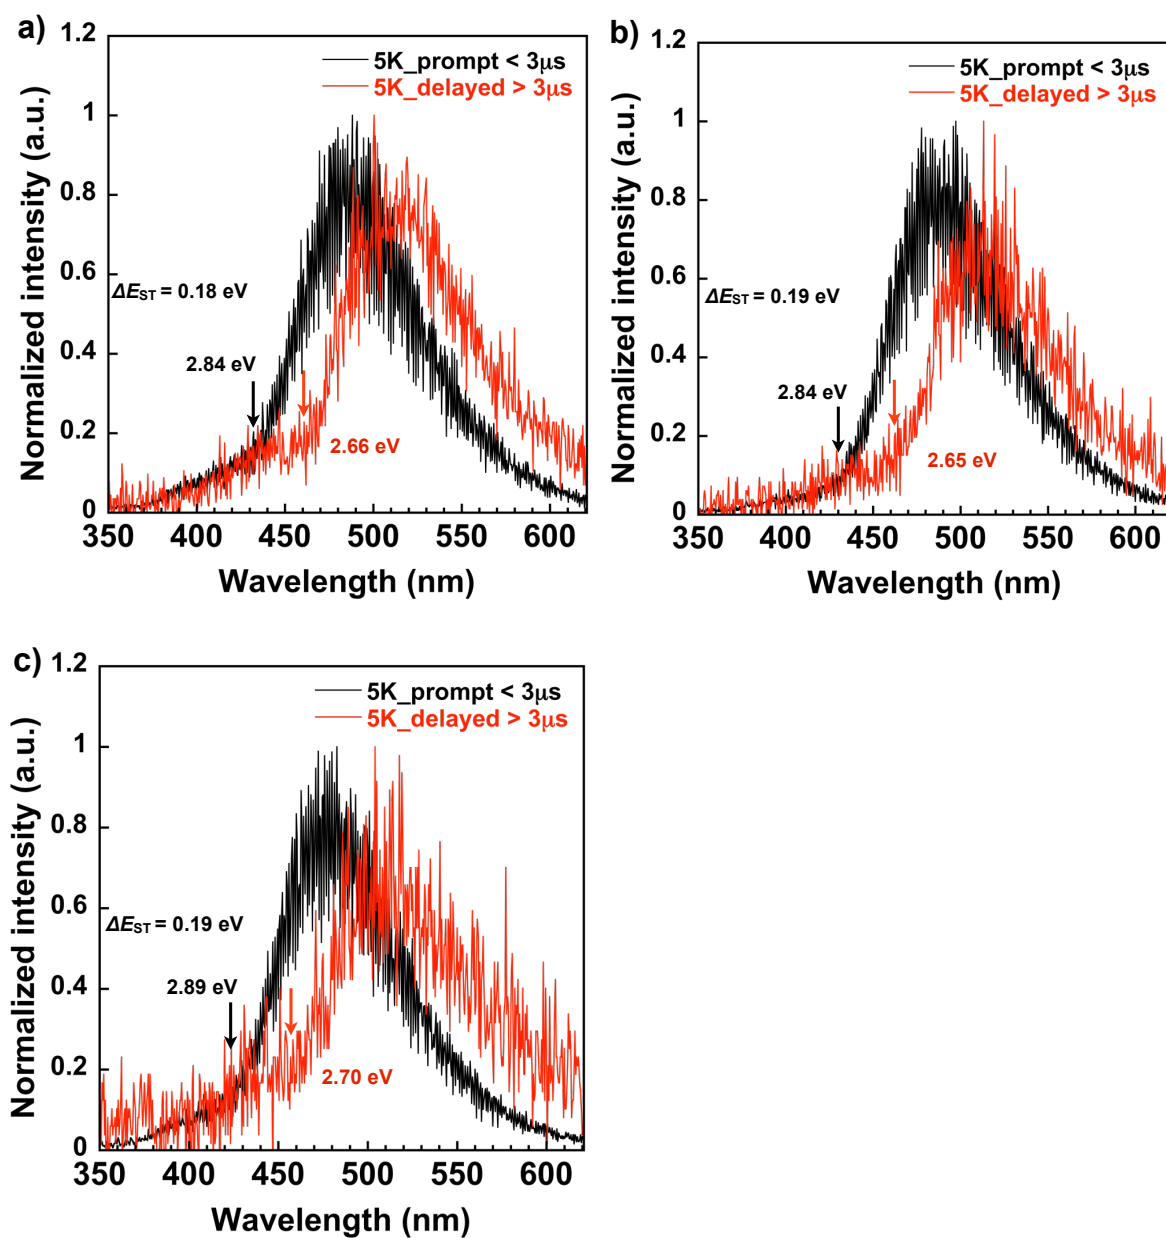

**Figure S-4.** Time resolved photoluminescence spectra of the a) Ac-HPM-, b) Ac-PPM-, and c) Ac-MPM-doped DPEPO film.

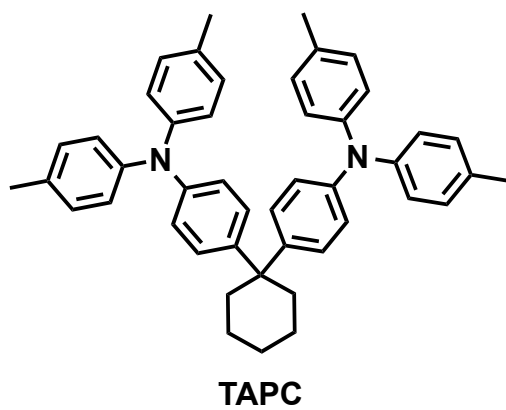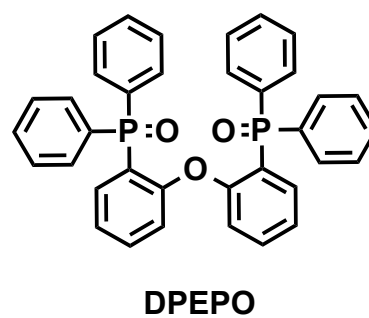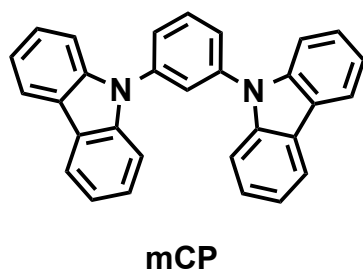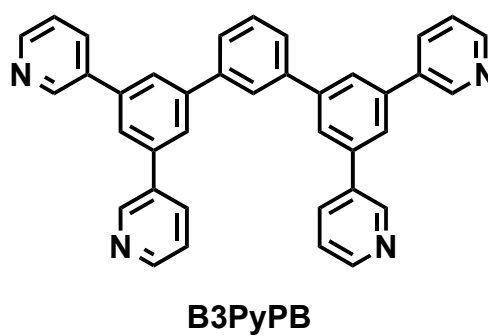

**Figure S-5.** Chemical structures of materials used in this work.

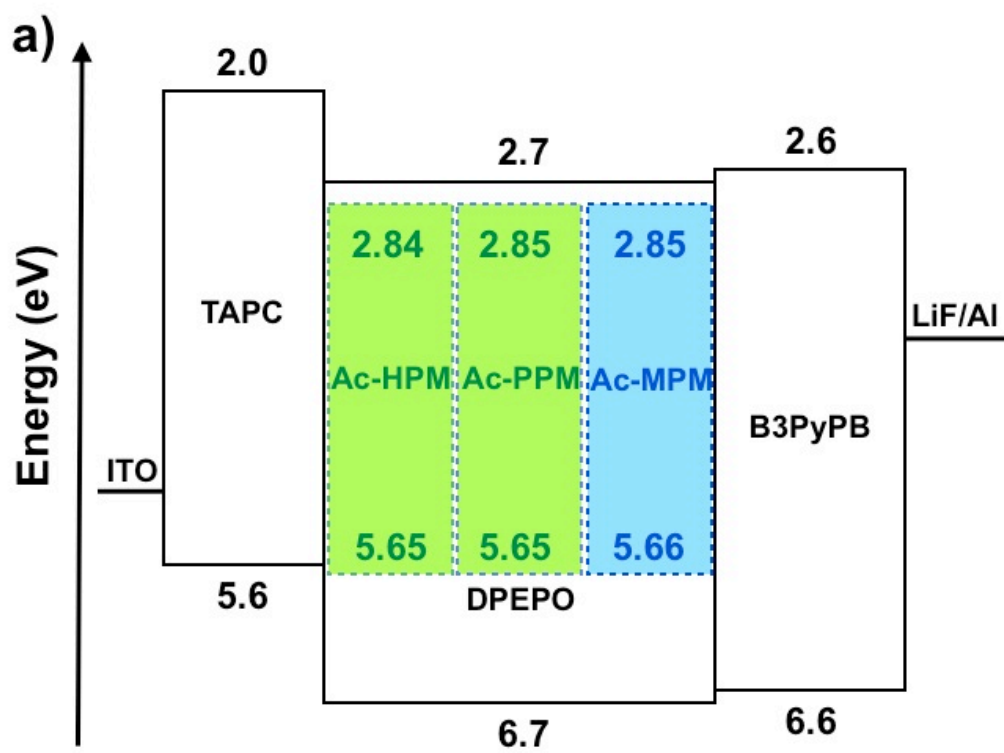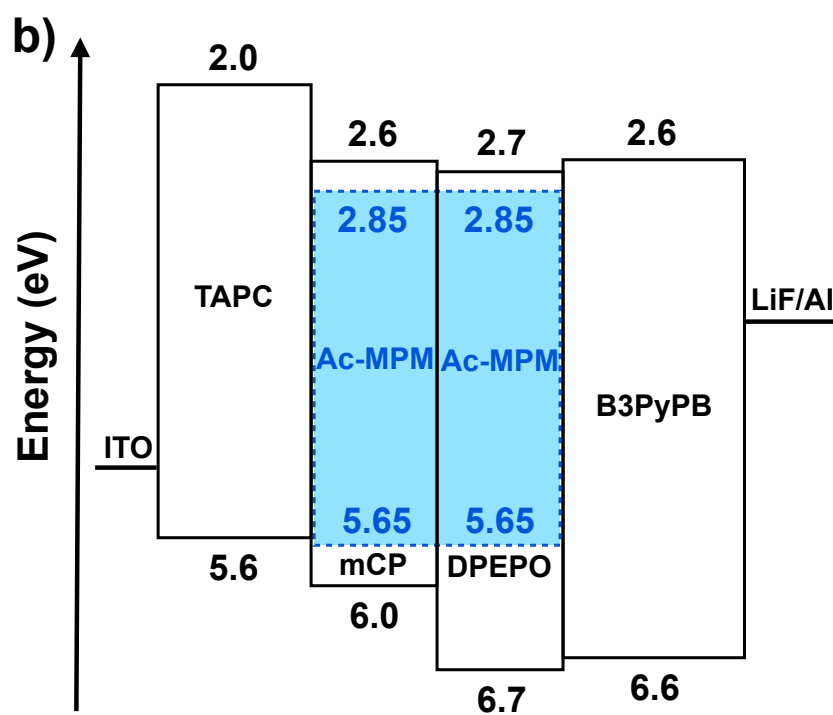

**Figure S-6.** Energy diagrams of Ac-RPM-based OLEDs.



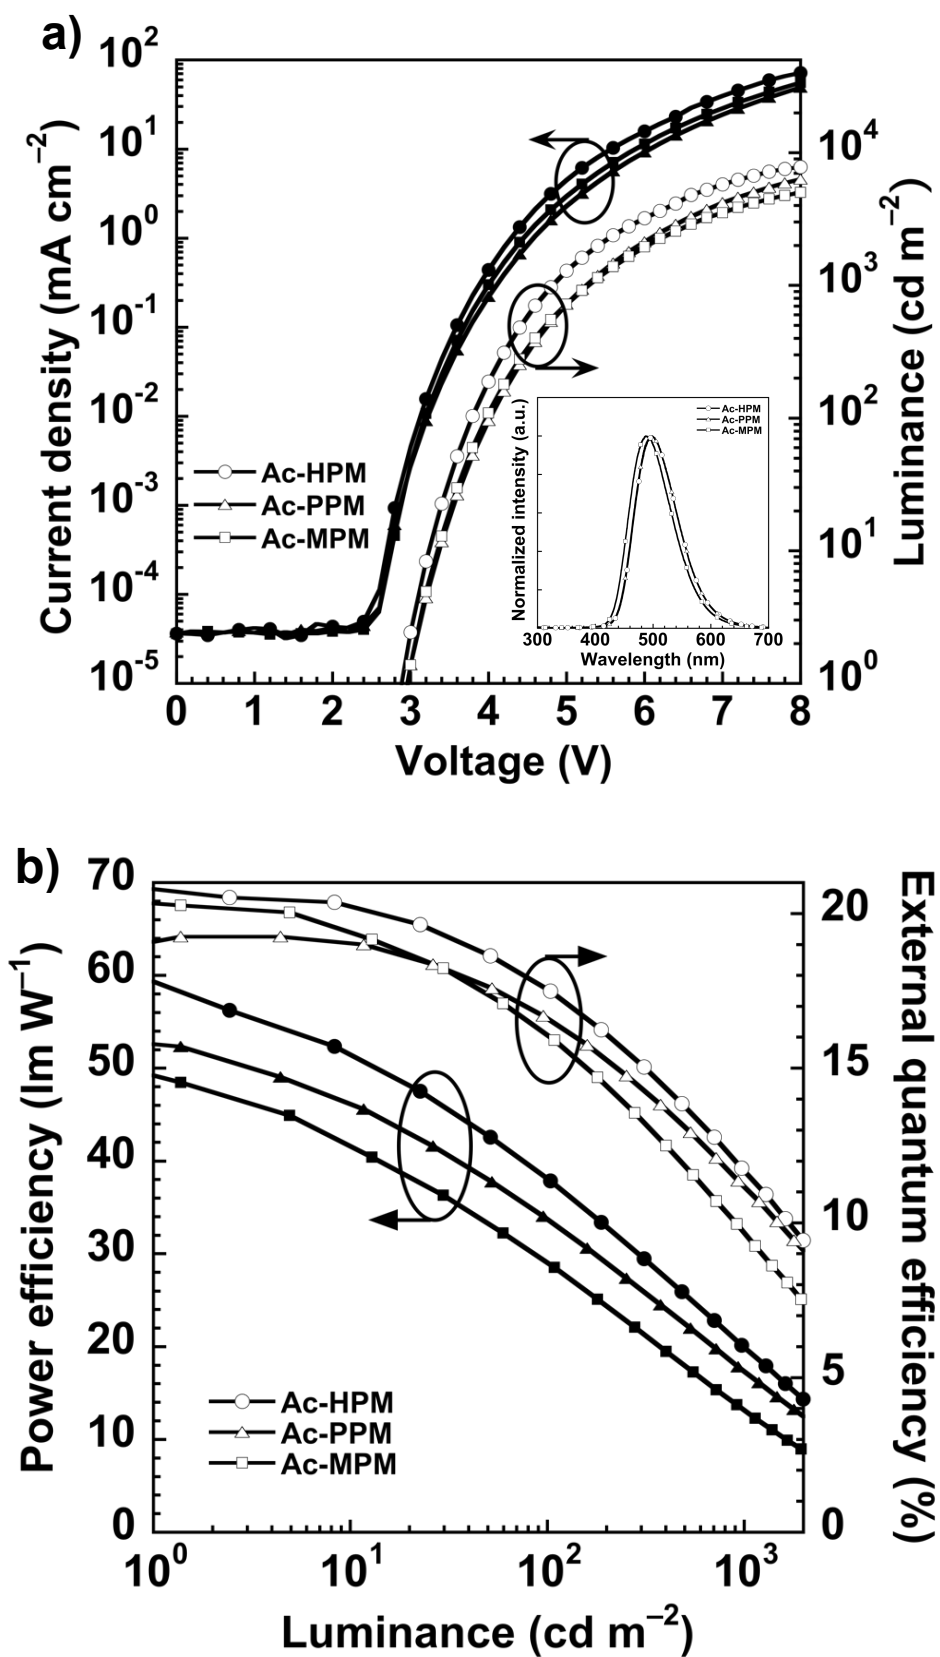

**Figure S-7.** a)  $J$ - $V$ - $L$  characteristics, inset: EL spectra at 0.5 mA, and b)  $PE$ - $EQE$ - $L$  characteristics of Ac-RPM-based OLEDs.

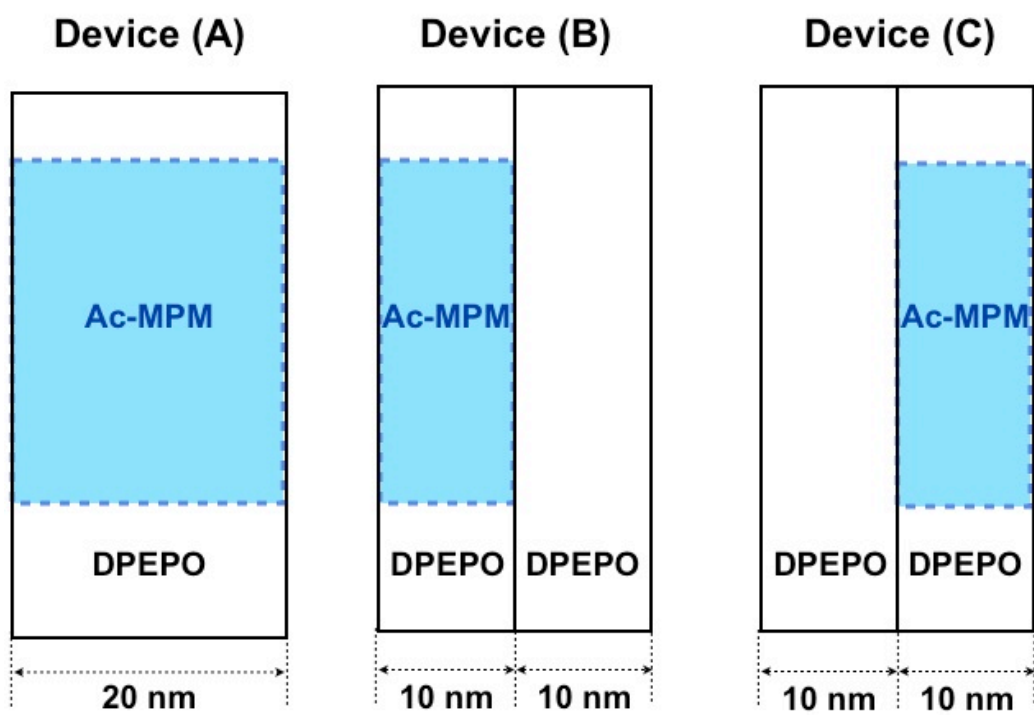

**Figure S-8.** Configuration of emissive layer in device (A)~(C).

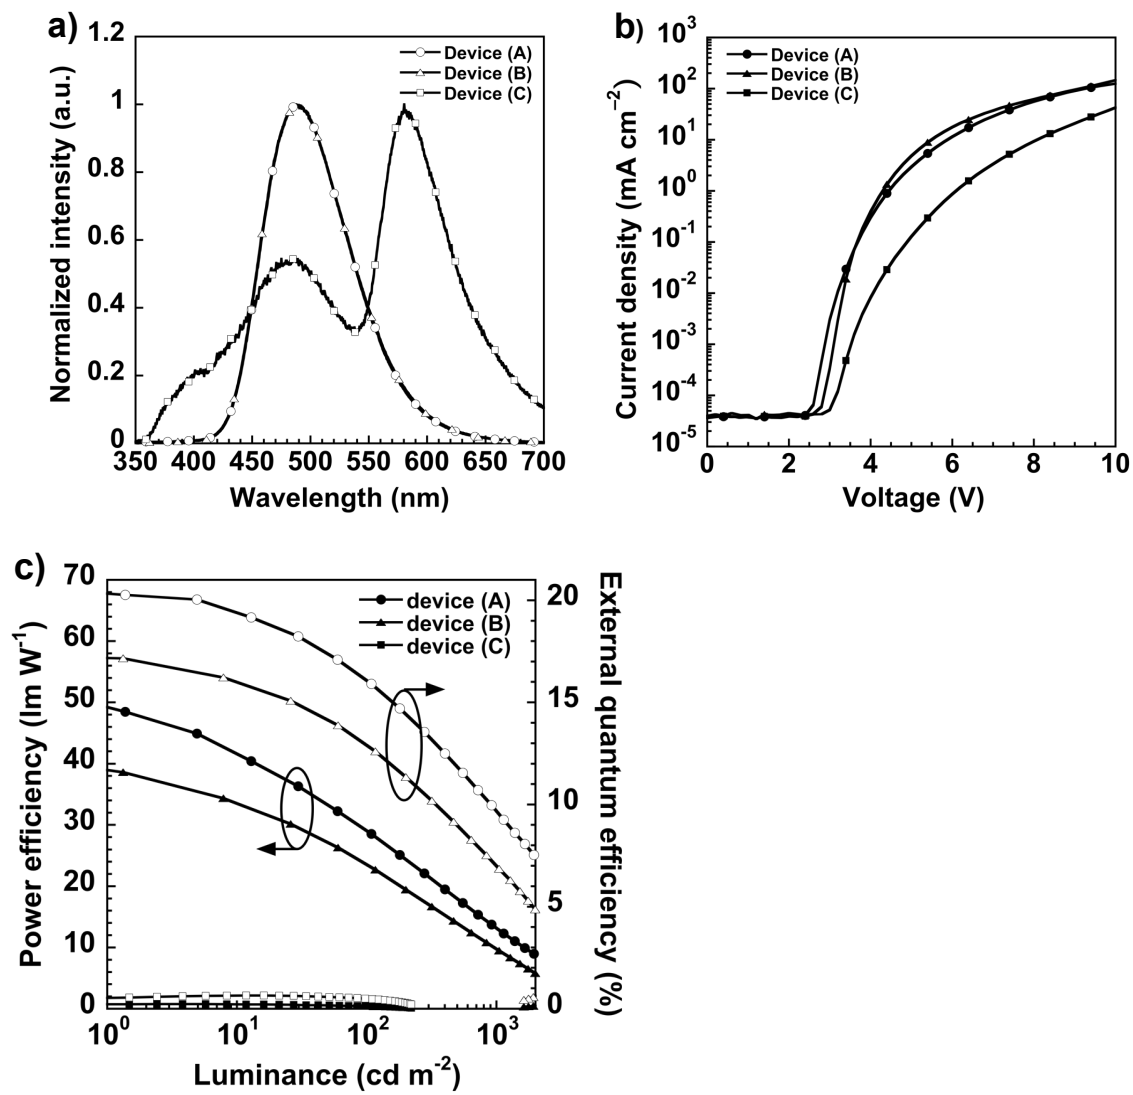

Figure S-9. a) EL spectra, b)  $J-V$ , and c)  $PE-EQE-L$  characteristics of device (A)~(C).

**Table S-1.** Calculated HOMO, LUMO,  $\Delta E_{H-L}$ ,  $E_S$ ,  $E_T$  and  $\Delta E_{ST}$  values (eV).

| Compound      | HOMO <sup>[a]</sup> | LUMO <sup>[a]</sup> | $\Delta E_{H-L}$ <sup>[b]</sup> | $E_S$ <sup>[c]</sup> | $E_T$ <sup>[c]</sup> | $\Delta E_{ST}$ <sup>[d]</sup> |
|---------------|---------------------|---------------------|---------------------------------|----------------------|----------------------|--------------------------------|
| <b>Ac-HPM</b> | -5.50               | -2.19               | 3.31                            | 2.85                 | 2.84                 | 0.01                           |
| <b>Ac-PPM</b> | -5.48               | -2.11               | 3.37                            | 2.90                 | 2.89                 | 0.01                           |
| <b>Ac-MPM</b> | -5.47               | -2.09               | 3.38                            | 2.91                 | 2.90                 | 0.01                           |

[a] Calculated at RB3LYP 6-311+G(d,p)//RB3LYP 6-31G(d). [b]  $\Delta E_{H-L}$  = HOMO–LUMO. [c] Lowest singlet ( $E_S$ ) and triplet ( $E_T$ ) energy from TD-DFT at RB3LYP 6-31G(d)//RB3LYP 6-31G(d). [d] Energy difference between  $E_S$  and  $E_T$  energy ( $\Delta E_{ST} = E_S - E_T$ ).

**Table S-2.** Summary of optical properties.

| Compound      | solution<br>$\lambda_{abs}$ [nm] <sup>[a]</sup> | solution<br>$\lambda_{em}$ [nm] <sup>[a]</sup> | film<br>$\lambda_{em}$ [nm] <sup>[b]</sup> | doped film<br>$\lambda_{em}$ [nm] <sup>[c]</sup> | EL<br>$\lambda_{em}$ [nm] <sup>[d]</sup> | EL<br>FWHM [nm] <sup>[e]</sup> |
|---------------|-------------------------------------------------|------------------------------------------------|--------------------------------------------|--------------------------------------------------|------------------------------------------|--------------------------------|
| <b>Ac-HPM</b> | 378                                             | 489                                            | 496                                        | 498                                              | 499                                      | 86                             |
| <b>Ac-PPM</b> | 381                                             | 484                                            | 486                                        | 498                                              | 498                                      | 86                             |
| <b>Ac-MPM</b> | 375                                             | 478                                            | 482                                        | 489                                              | 489                                      | 87                             |

[a] The absorption and emission peak of **Ac-RPM** in toluene ( $1.0 \times 10^{-5}$  M). [b] The emission peak of **Ac-RPM** neat film. [c] The emission peak of 10 wt% **Ac-RPM**-doped DPEPO film. [d] The emission peak of **Ac-RPM**-based device. [e] The full width a half maximum (FWHM) of **Ac-RPM**-based device.

**Table S-3.** Summary of OLED performances.

| Device | $V_{on}/\eta_p, on/\eta_c, on/$ EQE<br>[V/ lm W <sup>-1</sup> / cd A <sup>-1</sup> / %] <sup>[a]</sup> | $V_{100}/\eta_p, 100/\eta_c, 100/$ EQE<br>[V/ lm W <sup>-1</sup> / cd A <sup>-1</sup> / %] <sup>[b]</sup> | $V_{1000}/\eta_p, 1000/\eta_c, 1000/$ EQE<br>[V/ lm W <sup>-1</sup> / cd A <sup>-1</sup> / %] <sup>[c]</sup> | CIE (x, y) <sup>[d]</sup> |
|--------|--------------------------------------------------------------------------------------------------------|-----------------------------------------------------------------------------------------------------------|--------------------------------------------------------------------------------------------------------------|---------------------------|
| (A)    | 2.93 / 49.9 / 46.6 / 20.4                                                                              | 3.96 / 29.2 / 36.8 / 16.1                                                                                 | 5.27 / 13.2 / 22.1 / 9.7                                                                                     | (0.19, 0.37)              |
| (B)    | 3.14 / 39.4 / 39.4 / 17.2                                                                              | 3.94 / 23.8 / 29.7 / 13.0                                                                                 | 5.15 / 9.79 / 16.0 / 7.0                                                                                     | (0.19, 0.37)              |
| (C)    | 4.84 / 0.7 / 1.1 / 0.5                                                                                 | 8.03 / 0.4 / 1.0 / 0.5                                                                                    | – / – / – / –                                                                                                | (0.33, 0.34)              |

[a] Voltage ( $V$ ), power efficiency ( $\eta_p$ ), current efficiency ( $\eta_c$ ) and external quantum efficiency (EQE) at 1 cd m<sup>-2</sup>. [b]  $V$ ,  $\eta_p$ ,  $\eta_c$ , and EQE at 100 cd m<sup>-2</sup>. [c]  $V$ ,  $\eta_p$ ,  $\eta_c$ , and EQE at 1000 cd m<sup>-2</sup>. [d] CIE at 100 cd m<sup>-2</sup>.

**Table S-4.** Summary of performances in blue TADF-OLED.

|           | $V_{\text{on}}$ <sup>[a]</sup><br>[V] | $\eta_{p,100}/\eta_{\text{ext},100}$ <sup>[b]</sup><br>[lm W <sup>-1</sup> /%] | $\eta_{p,500}/\eta_{\text{ext},500}$ <sup>[c]</sup><br>[lm W <sup>-1</sup> /%] | $\eta_{p,1000}/\eta_{\text{ext},1000}$ <sup>[d]</sup><br>[lm W <sup>-1</sup> /%] | $\eta_{p,\text{max}}/\eta_{\text{ext},\text{max}}$ <sup>[e]</sup><br>[lm W <sup>-1</sup> /%] | CIE (x, y)  |
|-----------|---------------------------------------|--------------------------------------------------------------------------------|--------------------------------------------------------------------------------|----------------------------------------------------------------------------------|----------------------------------------------------------------------------------------------|-------------|
| This work | 2.8                                   | 34.0/17.2                                                                      | 20.6/12.3                                                                      | 15.5/10.1                                                                        | 61.6/24.5                                                                                    | (0.19,0.37) |
| Ref.[18]  | 3.7                                   | -                                                                              | -                                                                              | -/16.0                                                                           | -/19.5                                                                                       | (0.16,0.20) |
| Ref.[19]  | (4.0)                                 | -/17.1                                                                         | -                                                                              | -/10.4                                                                           | -/20.6                                                                                       | (0.19,0.35) |
| Ref.[20]  | (3.5)                                 | -                                                                              | -                                                                              | -                                                                                | -/20.1                                                                                       | (0.14,0.16) |
| Ref.[21]  | 3.20                                  | -                                                                              | -/11.3                                                                         | -                                                                                | -/21.2                                                                                       | (0.20,0.35) |
| Ref.[22]  | (4.0)                                 | -                                                                              | 18.0/16.7                                                                      | -                                                                                | 42.7/25.0                                                                                    | (0.18,0.33) |
| Ref.[23]  | 3.00                                  | -                                                                              | -                                                                              | 9.8/10.6                                                                         | 30.4/22.3                                                                                    | (0.15,0.20) |

[a] Voltage (V) at 1 cd m<sup>-2</sup>. [b] Power efficiency ( $\eta_p$ ) and external quantum efficiency ( $\eta_{\text{ext}}$ ) at 100 cd m<sup>-2</sup>. [c]  $\eta_p$ ,  $\eta_{\text{ext}}$  at 500 cd m<sup>-2</sup> [d]  $\eta_p$ ,  $\eta_{\text{ext}}$  at 1000 cd m<sup>-2</sup>. [e] Maximum power efficiency ( $\eta_{p,\text{max}}$ ), maximum external quantum efficiency ( $\eta_{\text{ext},\text{max}}$ ).

### Synthetic procedure

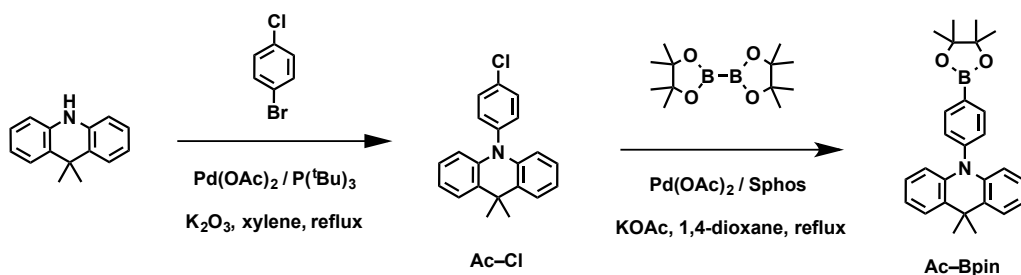

#### Synthesis of **Ac-Cl**:

9,9-Dimethyl-9,10-dihydroacridine (3.5 g, 16.7 mmol), 1-bromo-chlorobenzene (3.19 g, 16.7 mmol), and  $\text{K}_2\text{CO}_3$  (6.9 g, 50 mmol) were added to a round bottom flask. Xylene (200 ml) was added, and nitrogen was bubbled through the mixture for 1 hour. Then,  $\text{Pd}(\text{OAc})_2$  (0.19 g, 0.84 mmol) and  $\text{P}(\text{tBu})_3$  (0.6 ml, 2.5 mmol) were added and the resultant mixture was stirred for 48 hours at reflux temperature under  $\text{N}_2$  flow. The precipitate was filtered, and washed with brine, dried over anhydrous  $\text{Na}_2\text{SO}_4$ , filtered, and evaporated to dryness. The resulting solid was purified by chromatography on silica gel (eluent: hexane/toluene = 10:1) to afford **Ac-Cl** (3.2 g, 60%) as a yellow solid:  $^1\text{H-NMR}$  (400MHz,DMSO- $\text{d}_6$ ) :  $\delta$  = 7.75 (d, 2H,  $J$ =8.8 Hz), 7.49 (dd, 2H,  $J$ =7.6, 1.2 Hz), 7.41 (d, 2H,  $J$ =8.4 Hz), 7.01–6.89 (m, 4H), 6.14 (dd, 2H,  $J$ =8.4, 1.2 Hz), 1.61 (s, 6H) ppm.

#### Synthesis of **Ac-Bpin**:

**Ac-Cl** (3.2 g, 10.0 mmol),  $\text{KOAc}$  (2.9 g, 30 mmol), 4,4,4',4',5,5,5',5'-octamethyl-2,2'-bi-1,3,2-dioxaborolane (3.05 g, 12 mmol) were added to a round bottom flask. 1,4-Dioxane (100 ml) was added, and nitrogen bubbled through the mixture for 1 hour. Then,  $\text{Pd}(\text{OAc})_2$  (110 mg, 0.5 mmol) and **SPhos** (0.2 g, 0.5 mmol) were added and the resultant mixture was stirred for 2 hours at reflux temperature under  $\text{N}_2$  flow. The precipitate was filtered, and washed with brine, dried over anhydrous  $\text{Na}_2\text{SO}_4$ , filtered, and evaporated to dryness. The resulting solid was purified by chromatography on silica gel (eluent: hexane/toluene = 10:1) to afford **Ac-Bpin** (2.45 g, 60%) as a pale yellow solid:  $^1\text{H-NMR}$  (400MHz,DMSO) :  $\delta$  = 7.98 (d, 2H,  $J$ =8.4 Hz), 7.48 (dd, 2H,  $J$ =8.0, 2.0 Hz), 7.37 (d, 2H,  $J$ =8.4 Hz), 6.98–6.88 (m, 4H), 6.13 (dd, 2H,  $J$ =8.0, 1.2 Hz), 1.61 (s, 6H), 1.34 (s, 12H) ppm.

#### Synthesis of **Ac-HPM**:

**Ac-Bpin** (1.50 g, 3.65 mmol) and 4,6-dichloropyrimidine (0.27g, 1.73 mmol) were added to a round bottom flask. 1,4-dioxane (30 ml) and aqueous  $\text{K}_3\text{PO}_4$  (1.35 M, 6.8 ml) were added and nitrogen was bubbled through the mixture for 1 hour. Then,  $\text{Pd}_2(\text{dba})_3$  (170 mg, 0.18 mmol) and **Sphos** (75 mg, 0.18 mmol) were added and the resultant mixture was stirred for 4 hours at reflux temperature under  $\text{N}_2$  flow. The precipitate was filtered, and washed with brine, dried over anhydrous  $\text{Na}_2\text{SO}_4$ , filtered, and evaporated to dryness. The resulting solid was purified by chromatography on silica gel (eluent: hexane/ethyl acetate =

10:1 v/v) to afford **Ac-HPM** (0.45 g, 38%) as a yellow solid:  $^1\text{H-NMR}$  (400 MHz,  $\text{CDCl}_3$ ) :  $\delta$  = 9.43 (d, 1H,  $J$ =1.2 Hz), 8.45 (d, 4H,  $J$ =8.8 Hz), 8.30 (d, 1H,  $J$ =1.6 Hz), 7.55 (d, 4H,  $J$ =8.4 Hz), 7.48 (dd, 4H,  $J$ =7.6, 1.6 Hz), 7.01–6.93 (m, 8H), 6.35 (dd, 4H,  $J$ =8.0, 1.6 Hz), 1.71 (s, 12H) ppm ;  $^{13}\text{C-NMR}$  (100 MHz,  $\text{CDCl}_3$ ) :  $\delta$  = 164.19, 159.45, 144.05, 140.57, 136.75, 132.06, 130.20, 129.85, 126.42, 125.38, 120.8, 114.06, 113.14, 36.01, 31.29 ppm; MS:  $m/z$  = 648  $[\text{M}+\text{H}]^+$ ; Anal calcd for  $\text{C}_{46}\text{H}_{38}\text{N}_4$ : C, 85.42; H, 5.92; N, 8.66%. Found: C, 85.55; H, 5.90; N, 8.67%.

### Synthesis of **Ac-PPM**:

**Ac-Bpin** (1.42 g, 3.45 mmol) and 4,6-dichloro-2-phenylpyrimidine (0.39g, 1.73 mmol) were added to a round bottom flask. 1,4-dioxane (30 ml) and aqueous  $\text{K}_3\text{PO}_4$  (1.35 M, 6.4 ml) were added and nitrogen was bubbled through the mixture for 1 hour. Then,  $\text{Pd}_2(\text{dba})_3$  (160 mg, 0.17 mmol) and Sphos (70 mg, 0.17 mmol) were added and the resultant mixture was stirred for 2 hours at reflux temperature under  $\text{N}_2$  flow. The precipitate was filtered, and washed with brine, dried over anhydrous  $\text{Na}_2\text{SO}_4$ , filtered, and evaporated to dryness. The resulting solid was purified by chromatography on silica gel (eluent: chloroform) to afford **Ac-PPM** (0.82 g, 67%) as a yellow solid:  $^1\text{H-NMR}$  (400 MHz,  $\text{CDCl}_3$ ) :  $\delta$  = 8.80 (dd, 2H,  $J$ =8.0, 1.6 Hz), 8.59 (d, 4H,  $J$ =8.8 Hz), 8.20 (s, 1H), 7.59–7.48 (m, 11H), 7.59–6.94 (m, 8H), 6.38 (dd, 4H,  $J$ =8.0, 1.2 Hz), 1.72 (s, 12H) ppm;  $^{13}\text{C-NMR}$  (100 MHz,  $\text{CDCl}_3$ ) :  $\delta$  = 164.87, 164.26, 143.86, 140.64, 137.79, 137.26, 131.96, 130.99, 130.15, 129.94, 128.61, 128.53, 126.44, 125.38, 120.81, 114.09, 110.65, 36.02, 31.33 ppm ; MS:  $m/z$  = 724  $[\text{M}+\text{H}]^+$  ; Anal calcd for  $\text{C}_{52}\text{H}_{42}\text{N}_4$ : C, 86.39; H, 5.86; N, 7.75%. Found: C, 86.19; H, 5.81; N, 7.78%.

### Synthesis of **Ac-MPM**:

**Ac-Bpin** (1.50 g, 3.65 mmol) and 4,6-dichloro-2-methylpyrimidine (0.30g, 1.73 mmol) were added to a round bottom flask. 1,4-dioxane (30 ml) and aqueous  $\text{K}_3\text{PO}_4$  (1.35 M, 6.8 ml) were added and nitrogen was bubbled through the mixture for 1 hour. Then,  $\text{Pd}_2(\text{dba})_3$  (170 mg, 0.18 mmol) and Sphos (75 mg, 0.18 mmol) were added and the resultant mixture was stirred for 4 hours at reflux temperature under  $\text{N}_2$  flow. The precipitate was filtered, and washed with brine, dried over anhydrous  $\text{Na}_2\text{SO}_4$ , filtered, and evaporated to dryness. The resulting solid was purified by chromatography on silica gel (eluent: chloroform) to afford **Ac-MPM** (0.28 g, 23%) as a pale yellow solid:  $^1\text{H-NMR}$  (400 MHz,  $\text{CDCl}_3$ ) :  $\delta$  = 8.42 (d, 4H,  $J$ =8.8 Hz), 8.08 (s, 1H), 7.54–7.47 (m, 8H), 7.00–6.90 (m, 8H), 6.34 (dd, 4H,  $J$ =8.0, 1.6 Hz), 2.95 (s, 3H), 1.71 (s, 12H) ppm;  $^{13}\text{C-NMR}$  (100 MHz,  $\text{CDCl}_3$ ) :  $\delta$  = 169.02, 164.41, 143.74, 140.61, 137.29, 132.04, 130.12, 129.94, 126.40, 125.39, 120.79, 114.06, 110.51, 36.01, 31.35, 26.58 ppm; MS:  $m/z$  = 661  $[\text{M}+\text{H}]^+$  ; Anal calcd for  $\text{C}_{47}\text{H}_{40}\text{N}_4$ : C, 85.42; H, 6.10; N, 8.48%. Found: C, 85.47; H, 6.06; N, 8.49%.
